# Supplementary material
Source: Research Square preprint supplement (doi:10.21203/rs.3.rs-9555082/v1)
Supplement: Supplementary file 1 [file 3b7e0ab2a9da8b62d1db679a.docx]

| **Variables** | **N** | **Baseline weight/(g) ±s** | **F** | ***P* value** | **Body weight/(g) ±s** | **F** | ***P* value** | **Sucrose preference/(%)±s** | **F** | ***P* value** |
| --- | --- | --- | --- | --- | --- | --- | --- | --- | --- | --- |
| Control | 5 | 21.44 ± 0.83 | 0.7462 | 0.5402 | 27.38 ± 0.89 | 48.14 | ＜0.0001**** | 83.87 ± 4.90 | 43.13 | ＜0.0001**** |
| CUMS | 5 | 21.82 ± 0.39 | 23.52 ± 1.04 | 68.79 ± 4.05 |
| CUMS+*Pg*-L | 5 | 21.74 ± 0.62 | 21.64 ± 1.14 | 61.01 ± 4.62 |
| CUMS+*Pg*-H | 5 | 21.30 ± 0.63 | 20.16 ± 0.93 | 51.77 ± 4.88 |
| Control vs CUMS |  |  |  | 0.7816 |  |  | ＜0.0001**** |  |  | 0.0005*** |
| Control vs CUMS+*Pg*-L |  |  |  | 0.8771 |  |  | ＜0.0001**** |  |  | ＜0.0001**** |
| Control vs CUMS+*Pg*-H |  |  |  | 0.9850 |  |  | ＜0.0001**** |  |  | ＜0.0001**** |
| CUMS vs CUMS+*Pg*-L |  |  |  | 0.9971 |  |  | 0.0418* |  |  | 0.0733 |
| CUMS vs CUMS+*Pg*-H |  |  |  | 0.5803 |  |  | 0.0004*** |  |  | 0.0001*** |
| CUMS+*Pg*-L vs CUMS+*Pg*-H |  |  |  | 0.6982 |  |  | 0.1335 |  |  | 0.0280* |

| **Variables** | **N** | **Total distance/(cm) ±s** | **F** | ***P* value** | **Immobility time/(s)±s** | **F** | ***P* value** | **Time in central area/(s)±s** | **F** | ***P* value** | **Distance in central area/(cm) ±s** | **F** | ***P* value** |
| --- | --- | --- | --- | --- | --- | --- | --- | --- | --- | --- | --- | --- | --- |
| Control | 5 | 2883.15 ± 269.42 | 44.32 | ＜0.0001**** | 39.56 ± 11.79 | 19.14 | ＜0.0001**** | 52.24 ± 4.92 | 66.80 | ＜0.0001**** | 734.26 ± 142.46 | 28.98 | ＜0.0001**** |
| CUMS | 5 | 2184.67 ± 228.57 | 76.96 ± 16.35 | 33.77 ± 2.91 | 498.23 ± 43.53 |
| CUMS+*Pg*-L | 5 | 1796.62 ± 175.32 | 96.50 ± 14.01 | 26.41 ± 4.32 | 349.99 ± 53.89 |
| CUMS+*Pg*-H | 5 | 1408.16 ± 151.73 | 111.94 ± 20.46 | 21.25 ± 1.92 | 281.21 ± 50.35 |
| Control vs CUMS |  |  |  | 0.0004*** |  |  | 0.0094** |  |  | ＜0.0001**** |  |  | 0.0013** |
| Control vs CUMS+*Pg*-L |  |  |  | ＜0.0001**** |  |  | 0.0002*** |  |  | ＜0.0001**** |  |  | ＜0.0001**** |
| Control vs CUMS+*Pg*-H |  |  |  | ＜0.0001**** |  |  | ＜0.0001**** |  |  | ＜0.0001**** |  |  | ＜0.0001**** |
| CUMS vs CUMS+*Pg*-L |  |  |  | 0.0461* |  |  | 0.2536 |  |  | 0.0292* |  |  | 0.0746 |
| CUMS vs CUMS+*Pg*-H |  |  |  | 0.0001*** |  |  | 0.0153* |  |  | 0.0004*** |  |  | 0.0056** |
| CUMS+*Pg*-L vs CUMS+*Pg*-H |  |  |  | 0.0458* |  |  | 0.4449 |  |  | 0.1656 |  |  | 0.5709 |

**P*＜0.05, ***P*＜0.01, ****P*＜0.001, *****P*＜0.0001

Note: Post hoc comparisons were performed using Tukey’s multiple comparison test (GraphPad Prism 9.5.0), and adjusted *p*-values are reported in the table.

Table 1 The Body Weight and Behavioral Test Results of the Four Groups of Mice
